# Supplementary material
Source: PubMed Central journal article supplement (PMC5734533)
Supplement: SuppTable_297.pdf [file SuppTable_297.pdf]

Supplementary Table 1. Fit indices for LTA models of QIDS-SR<sub>16</sub> at baseline and week 12

| <b># of Subtypes</b>                                                    | <b><i>df</i></b> | <b>G<sup>2</sup></b> | <b>AIC</b> | <b>BIC</b> |
|-------------------------------------------------------------------------|------------------|----------------------|------------|------------|
| <b>No Measurement Invariance Assumed</b>                                |                  |                      |            |            |
| 2                                                                       | 4294967228       | 6159.37              | 6293.37    | 6558.59    |
| 3                                                                       | 4294967191       | 6015.72              | 6223.72    | 6635.39    |
| 4                                                                       | 4294967152       | 5884.49              | 6170.49    | 6736.55    |
| 5                                                                       | 4294967111       | 5793.33              | 6161.33    | 6889.68    |
| s6                                                                      | 4294967068       | 5643.23              | 6097.23    | 6995.79    |
| 7                                                                       | 4294967023       | 5624.41              | 6168.41    | 7245.10    |
| <b>Measurement Invariance Assumed:</b>                                  |                  |                      |            |            |
| <b>Item-response probabilities constrained to be equal across times</b> |                  |                      |            |            |
| 2                                                                       | 4294967260       | 6320.06              | 6390.06    | 6528.60    |
| 3                                                                       | 4294967239       | 6113.50              | 6225.50    | 6447.17    |
| 4                                                                       | 4294967216       | 6002.34              | 6160.34    | 6473.05    |
| 5                                                                       | 4294967191       | 5963.18              | 6171.18    | 6582.86    |
| 6                                                                       | 4294967164       | 5851.89              | 6113.89    | 6632.44    |
| 7                                                                       | 4294967135       | 5823.23              | 6143.23    | 6776.58    |
